# Supplementary material for: Novel Selection Approaches to Identify Antibodies Targeting Neoepitopes on the C5b6 Intermediate Complex to Inhibit Membrane Attack Complex Formation
Source: Antibodies (Basel). 2021 Oct 12;10(4):39. doi: 10.3390/antib10040039 (PMC8544208; doi:10.3390/antib10040039)
Supplement: Supplementary file 1 [file antibodies-10-00039-s001.zip › File S2.xlsx]

## Sheet: Sheet1
Publication Name	Run	Conc. Call	Conc (μM)	TCC (OD450-570)	Background TCC (OD450-570)	% of 100% TTC production
Clone 1	1	High	1.28	0.14	0.099	10.2401
Clone 1	1	Low	0.04	1.412	1.371	141.81
Clone 1	2	High	1.28	0.672	0.631	65.2676
Clone 1	2	Low	0.04	0.873	0.832	86.058
Clone 1	3	High	1.28	1.037	0.996	103.021
Clone 1	3	Low	0.04	1.032	0.991	102.504
Clone 1	4	High	1.28	1.024	0.983	101.677
Clone 1	4	Low	0.04	0.95	0.909	94.0225
Clone 2	1	High	1	0.294	0.253	26.1691
Clone 2	1	Low	0.03	0.676	0.635	65.6813
Clone 2	2	High	1	0.585	0.544	56.2687
Clone 2	2	Low	0.03	0.883	0.842	87.0924
Clone 2	3	High	1	0.979	0.938	97.0222
Clone 2	3	Low	0.03	1.339	1.298	134.259
Clone 2	4	High	1	0.955	0.914	94.5397
Clone 2	4	Low	0.03	1.04	0.999	103.332
Clone A	1	High	1.11	0.512	0.471	48.7179
Clone A	1	Low	0.03	1.13	1.089	112.641
Clone A	2	High	1.11	0.748	0.707	73.1286
Clone A	2	Low	0.03	0.938	0.897	92.7813
Clone A	3	High	1.11	0.946	0.905	93.6088
Clone A	3	Low	0.03	1.111	1.07	110.676
Clone A	4	High	1.11	0.807	0.766	79.2313
Clone A	4	Low	0.03	0.896	0.855	88.437
Clone B	1	High	1.6	0.363	0.322	33.3061
Clone B	1	Low	0.05	0.728	0.687	71.0599
Clone B	2	High	1.6	0.396	0.355	36.7195
Clone B	2	Low	0.05	0.661	0.62	64.1298
Clone B	3	High	1.6	0.538	0.497	51.4073
Clone B	3	Low	0.05	1.115	1.074	111.089
Clone B	4	High	1.6	0.45	0.409	42.305
Clone B	4	Low	0.05	0.762	0.721	74.5767
Clone C	1	High	1.51	0.409	0.368	38.0641
Clone C	1	Low	0.05	0.914	0.873	90.2989
Clone C	2	High	1.51	0.578	0.537	55.5447
Clone C	2	Low	0.05	0.818	0.777	80.3691
Clone C	3	High	1.51	0.892	0.851	88.0233
Clone C	3	Low	0.05	1.144	1.103	114.089
Clone C	4	High	1.51	0.822	0.781	80.7828
Clone C	4	Low	0.05	0.968	0.927	95.8844
Clone 3	1	High	2.22	0.619	0.578	59.7855
Clone 3	1	Low	0.07	1.105	1.064	110.055
Clone 3	2	High	2.22	0.685	0.644	66.6122
Clone 3	2	Low	0.07	1.301	1.26	130.328
Clone 3	3	High	2.22	0.969	0.928	95.9878
Clone 3	3	Low	0.07	1.139	1.098	113.572
Clone 3	4	High	2.22	0.739	0.698	72.1977
Clone 3	4	Low	0.07	1.19	1.149	118.847
Clone D	1	High	1.91	0.635	0.594	61.4405
Clone D	1	Low	0.06	1.113	1.072	110.882
Clone D	2	High	1.91	0.492	0.451	46.6492
Clone D	2	Low	0.06	0.927	0.886	91.6435
Clone D	3	High	1.91	0.643	0.602	62.268
Clone D	3	Low	0.06	0.883	0.842	87.0924
Clone D	4	High	1.91	0.485	0.444	45.9252
Clone D	4	Low	0.06	0.746	0.705	72.9218
Clone 4	1	High	1.27	0.355	0.314	32.4786
Clone 4	1	Low	0.04	0.577	0.536	55.4412
Clone 4	2	High	1.27	0.384	0.343	35.4783
Clone 4	2	Low	0.04	0.565	0.524	54.2
Clone 4	3	High	1.27	0.943	0.902	93.2985
Clone 4	3	Low	0.04	1.013	0.972	100.539
Clone 4	4	High	1.27	0.742	0.701	72.508
Clone 4	4	Low	0.04	0.82	0.779	80.576
Clone 5	1	High	1.61133	0.721	0.68	70.3359
Clone 5	1	Low	0.0503542	1.025	0.984	101.78
Clone 5	2	High	1.61133	0.342	0.301	31.134
Clone 5	2	Low	0.0503542	1.014	0.973	100.642
Clone 5	3	High	1.61133	1.182	1.141	118.019
Clone 5	3	Low	0.0503542	1.239	1.198	123.915
Clone 5	4	High	1.61133	1.07	1.029	106.435
Clone 5	4	Low	0.0503542	0.965	0.924	95.5741
Clone E	1	High	0.696	0.771	0.73	75.5076
Clone E	1	Low	0.02175	0.644	0.603	62.3714
Clone E	2	High	0.696	0.403	0.362	37.4435
Clone E	2	Low	0.02175	0.682	0.641	66.3019
Clone E	3	High	0.696	0.955	0.914	94.5397
Clone E	3	Low	0.02175	0.97	0.929	96.0912
Clone E	4	High	0.696	0.757	0.716	74.0596
Clone E	4	Low	0.02175	0.822	0.781	80.7828
Clone 6	1	High	1.28667	0.818	0.777	80.3691
Clone 6	1	Low	0.0402083	1.595	1.554	160.738
Clone 6	2	High	1.28667	0.669	0.628	64.9573
Clone 6	2	Low	0.0402083	1.094	1.053	108.917
Clone 6	3	High	1.28667	0.982	0.941	97.3325
Clone 6	3	Low	0.0402083	0.912	0.871	90.092
Clone 6	4	High	1.28667	0.902	0.861	89.0577
Clone 6	4	Low	0.0402083	0.914	0.873	90.2989
Clone F	1	High	1.28133	0.495	0.454	46.9596
Clone F	1	Low	0.0400417	1.257	1.216	125.777
Clone F	2	High	1.28133	0.509	0.468	48.4076
Clone F	2	Low	0.0400417	0.968	0.927	95.8844
Clone F	3	High	1.28133	1.011	0.97	100.332
Clone F	3	Low	0.0400417	1.142	1.101	113.882
Clone F	4	High	1.28133	0.746	0.705	72.9218
Clone F	4	Low	0.0400417	1.034	0.993	102.711
Clone 7	1	High	0.972	0.61	0.569	58.8546
Clone 7	1	Low	0.030375	1.492	1.451	150.084
Clone 7	2	High	0.972	0.623	0.582	60.1992
Clone 7	2	Low	0.030375	1.097	1.056	109.228
Clone 7	3	High	0.972	0.938	0.897	92.7813
Clone 7	3	Low	0.030375	0.846	0.805	83.2653
Clone 7	4	High	0.972	0.956	0.915	94.6431
Clone 7	4	Low	0.030375	0.896	0.855	88.437
Clone 8	1	High	1.60067	0.867	0.826	85.4374
Clone 8	1	Low	0.0500208	1.309	1.268	131.156
Clone 8	2	High	1.60067	0.622	0.581	60.0958
Clone 8	2	Low	0.0500208	0.936	0.895	92.5744
Clone 8	3	High	1.60067	0.903	0.862	89.1611
Clone 8	3	Low	0.0500208	0.869	0.828	85.6443
Clone 8	4	High	1.60067	0.822	0.781	80.7828
Clone 8	4	Low	0.0500208	0.787	0.746	77.1626
Clone 9	1	High	1.37933	0.565	0.524	54.2
Clone 9	1	Low	0.0431042	1.549	1.508	155.98
Clone 9	2	High	1.37933	0.521	0.48	49.6489
Clone 9	2	Low	0.0431042	1.12	1.079	111.607
Clone 9	3	High	1.37933	0.763	0.722	74.6802
Clone 9	3	Low	0.0431042	0.861	0.82	84.8168
Clone 9	4	High	1.37933	0.679	0.638	65.9916
Clone 9	4	Low	0.0431042	0.811	0.77	79.6451
Clone 10	1	High	3.094	1.27	1.229	127.122
Clone 10	1	Low	0.0966875	1.588	1.547	160.014
Clone 10	2	High	3.094	0.659	0.618	63.9229
Clone 10	2	Low	0.0966875	1.522	1.481	153.187
Clone 10	3	High	3.094	0.911	0.87	89.9886
Clone 10	3	Low	0.0966875	0.821	0.78	80.6794
Clone 10	4	High	3.094	0.755	0.714	73.8527
Clone 10	4	Low	0.0966875	0.832	0.791	81.8172
Clone 11	1	High	1.411	0.288	0.247	25.5485
Clone 11	1	Low	0.0440938	0.396	0.355	36.7195
Clone 11	2	High	1.411	0.439	0.398	41.1672
Clone 11	2	Low	0.0440938	0.848	0.807	83.4722
Clone 11	3	High	1.411	0.836	0.795	82.2309
Clone 11	3	Low	0.0440938	1.076	1.035	107.055
Clone 11	4	High	1.411	0.889	0.848	87.713
Clone 11	4	Low	0.0440938	0.946	0.905	93.6088
Clone G	1	High	1.44467	0.37	0.329	34.0302
Clone G	1	Low	0.0451458	0.659	0.618	63.9229
Clone G	2	High	1.44467	0.486	0.445	46.0286
Clone G	2	Low	0.0451458	1.496	1.455	150.498
Clone G	3	High	1.44467	0.727	0.686	70.9565
Clone G	3	Low	0.0451458	0.994	0.953	98.5737
Clone G	4	High	1.44467	0.802	0.761	78.7141
Clone G	4	Low	0.0451458	0.89	0.849	87.8164
Clone 12	1	High	1.24667	0.738	0.697	72.0943
Clone 12	1	Low	0.0389583	1.043	1.002	103.642
Clone 12	2	High	1.24667	0.567	0.526	54.4069
Clone 12	2	Low	0.0389583	1.004	0.963	99.608
Clone 12	3	High	1.24667	0.851	0.81	83.7825
Clone 12	3	Low	0.0389583	0.869	0.828	85.6443
Clone 12	4	High	1.24667	0.816	0.775	80.1622
Clone 12	4	Low	0.0389583	0.792	0.751	77.6798
Clone 13	1	High	1.194	0.495	0.454	46.9596
Clone 13	1	Low	0.0373125	1.188	1.147	118.64
Clone 13	2	High	1.194	0.536	0.495	51.2004
Clone 13	2	Low	0.0373125	0.983	0.942	97.4359
Clone 13	3	High	1.194	0.81	0.769	79.5416
Clone 13	3	Low	0.0373125	1.064	1.023	105.814
Clone 13	4	High	1.194	0.772	0.731	75.6111
Clone 13	4	Low	0.0373125	0.953	0.912	94.3328
Clone 14	1	High	1.63267	0.427	0.386	39.926
Clone 14	1	Low	0.0510208	0.483	0.442	45.7183
Clone 14	2	High	1.63267	0.543	0.502	51.9244
Clone 14	2	Low	0.0510208	0.995	0.954	98.6771
Clone 14	3	High	1.63267	0.651	0.61	63.0954
Clone 14	3	Low	0.0510208	0.954	0.913	94.4363
Clone 14	4	High	1.63267	0.652	0.611	63.1989
Clone 14	4	Low	0.0510208	0.667	0.626	64.7504
Clone 15	1	High	1.052	0.456	0.415	42.9256
Clone 15	1	Low	0.032875	0.857	0.816	84.4031
Clone 15	2	High	1.052	0.613	0.572	59.1649
Clone 15	2	Low	0.032875	1.473	1.432	148.119
Clone 15	3	High	1.052	0.606	0.565	58.4409
Clone 15	3	Low	0.032875	0.804	0.763	78.921
Clone 15	4	High	1.052	0.6	0.559	57.8202
Clone 15	4	Low	0.032875	0.613	0.572	59.1649
Clone 16	1	High	1.59733	0.414	0.373	38.5813
Clone 16	1	Low	0.0499167	0.919	0.878	90.816
Clone 16	2	High	1.59733	0.354	0.313	32.3752
Clone 16	2	Low	0.0499167	1.036	0.995	102.918
Clone 16	3	High	1.59733	0.783	0.742	76.7489
Clone 16	3	Low	0.0499167	1.168	1.127	116.571
Clone 16	4	High	1.59733	0.668	0.627	64.8538
Clone 16	4	Low	0.0499167	0.638	0.597	61.7508
Clone 17	1	High	0.94	0.677	0.636	65.7847
Clone 17	1	Low	0.029375	1.31	1.269	131.259
Clone 17	2	High	0.94	0.774	0.733	75.818
Clone 17	2	Low	0.029375	1.282	1.241	128.363
Clone 17	3	High	0.94	0.571	0.53	54.8206
Clone 17	3	Low	0.029375	1.139	1.098	113.572
Clone 17	4	High	0.94	0.675	0.634	65.5779
Clone 17	4	Low	0.029375	0.596	0.555	57.4065
Clone 18	1	High	0.931	1.184	1.143	118.226
Clone 18	1	Low	0.0290938	2.117	2.076	214.731
Clone 18	2	High	0.931	0.541	0.5	51.7176
Clone 18	2	Low	0.0290938	1.068	1.027	106.228
Clone 18	3	High	0.931	0.681	0.64	66.1985
Clone 18	3	Low	0.0290938	0.704	0.663	68.5775
Clone 18	4	High	0.931	1.022	0.981	101.47
Clone 18	4	Low	0.0290938	0.66	0.619	64.0263
Clone 19	1	High	2.06067	0.595	0.554	57.3031
Clone 19	1	Low	0.0643958	0.682	0.641	66.3019
Clone 19	2	High	2.06067	0.563	0.522	53.9931
Clone 19	2	Low	0.0643958	1.095	1.054	109.021
Clone 19	3	High	2.06067	0.563	0.522	53.9931
Clone 19	3	Low	0.0643958	0.833	0.792	81.9206
Clone 19	4	High	2.06067	0.901	0.86	88.9542
Clone 19	4	Low	0.0643958	0.69	0.649	67.1294
Clone 20	1	High	0.96	1.384	1.343	138.913
Clone 20	1	Low	0.03	1.808	1.767	182.77
Clone 20	2	High	0.96	0.668	0.627	64.8538
Clone 20	2	Low	0.03	1.317	1.276	131.983
Clone 20	3	High	0.96	0.48	0.439	45.408
Clone 20	3	Low	0.03	0.982	0.941	97.3325
Clone 20	4	High	0.96	1.015	0.974	100.746
Clone 20	4	Low	0.03	1.081	1.04	107.573
Clone 21	1	High	0.981	0.692	0.651	67.3363
Clone 21	1	Low	0.0306562	1.527	1.486	153.705
Clone 21	2	High	0.981	0.576	0.535	55.3378
Clone 21	2	Low	0.0306562	1.26	1.219	126.087
Clone 21	3	High	0.981	0.432	0.391	40.4431
Clone 21	3	Low	0.0306562	0.775	0.734	75.9214
Clone 21	4	High	0.981	0.728	0.687	71.0599
Clone 21	4	Low	0.0306562	0.777	0.736	76.1283
Clone 22	1	High	2.07533	0.868	0.827	85.5409
Clone 22	1	Low	0.0648542	1.086	1.045	108.09
Clone 22	2	High	2.07533	0.73	0.689	71.2668
Clone 22	2	Low	0.0648542	1.391	1.35	139.637
Clone 22	3	High	2.07533	0.385	0.344	35.5817
Clone 22	3	Low	0.0648542	0.683	0.642	66.4054
Clone 22	4	High	2.07533	0.613	0.572	59.1649
Clone 22	4	Low	0.0648542	0.787	0.746	77.1626
Clone 23	1	High	0.989333	0.874	0.833	86.1615
Clone 23	1	Low	0.0309167	1.159	1.118	115.64
Clone 23	2	High	0.989333	0.523	0.482	49.8557
Clone 23	2	Low	0.0309167	2.063	2.022	209.146
Clone 23	3	High	0.989333	0.582	0.541	55.9584
Clone 23	3	Low	0.0309167	0.868	0.827	85.5409
Clone 23	4	High	0.989333	0.871	0.83	85.8512
Clone 23	4	Low	0.0309167	0.895	0.854	88.3336
Clone H	1	High	1.17467	0.621	0.58	59.9924
Clone H	1	Low	0.0367083	1.186	1.145	118.433
Clone H	2	High	1.17467	0.441	0.4	41.3741
Clone H	2	Low	0.0367083	2.144	2.103	217.524
Clone H	3	High	1.17467	0.34	0.299	30.9271
Clone H	3	Low	0.0367083	0.734	0.693	71.6805
Clone H	4	High	1.17467	0.668	0.627	64.8538
Clone H	4	Low	0.0367083	0.865	0.824	85.2306
Isotype	1	High	14	0.973	0.932	96.4015
Isotype	1	Low	0.4375	1.726	1.685	174.288
Anti-C5 Ctrl	1	High	0.2	0.32	0.279	28.8584
Anti-C5 Ctrl	1	Low	0.00625	1.813	1.772	183.287
Disabled Anti-C5 Ctrl	1	High	0.2	1.31	1.269	131.259
Disabled Anti-C5 Ctrl	1	Low	0.00625	1.563	1.522	157.428
Isotype	1	High	14	1.842	1.801	186.287
Isotype	1	Low	0.4375	1.472	1.431	148.016
Anti-C5 Ctrl	1	High	0.2	0.221	0.18	18.6183
Anti-C5 Ctrl	1	Low	0.00625	1.528	1.487	153.808
Disabled Anti-C5 Ctrl	1	High	0.2	1.051	1.01	104.469
Disabled Anti-C5 Ctrl	1	Low	0.00625	1.282	1.241	128.363
Isotype	1	High	14	0.798	0.757	78.3004
Isotype	1	Low	0.4375	0.661	0.62	64.1298
Anti-C5 Ctrl	1	High	0.2	0.794	0.753	77.8867
Anti-C5 Ctrl	1	Low	0.00625	0.929	0.888	91.8504
Disabled Anti-C5 Ctrl	1	High	0.2	0.942	0.901	93.1951
Disabled Anti-C5 Ctrl	1	Low	0.00625	1.168	1.127	116.571
Isotype	1	High	14	2.253	2.212	228.799
Isotype	1	Low	0.4375	1.916	1.875	193.941
Anti-C5 Ctrl	1	High	0.2	0.518	0.477	49.3386
Anti-C5 Ctrl	1	Low	0.00625	0.968	0.927	95.8844
Disabled Anti-C5 Ctrl	1	High	0.2	0.691	0.65	67.2328
Disabled Anti-C5 Ctrl	1	Low	0.00625	1.191	1.15	118.95
Isotype	1	High	14	0.691	0.65	67.2328
Isotype	1	Low	0.4375	1.191	1.15	118.95
Anti-C5 Ctrl	1	High	0.2	0.283	0.242	25.0313
Anti-C5 Ctrl	1	Low	0.00625	1.064	1.023	105.814
Disabled Anti-C5 Ctrl	1	High	0.2	1.028	0.987	102.09
Disabled Anti-C5 Ctrl	1	Low	0.00625	1.527	1.486	153.705
Isotype	2	High	14	0.859	0.818	84.6099
Isotype	2	Low	0.4375	1.455	1.414	146.257
Anti-C5 Ctrl	2	High	0.2	0.183	0.142	14.6878
Anti-C5 Ctrl	2	Low	0.00625	0.989	0.948	98.0565
Disabled Anti-C5 Ctrl	2	High	0.2	0.917	0.876	90.6092
Disabled Anti-C5 Ctrl	2	Low	0.00625	1.137	1.096	113.365
Isotype	2	High	14	1.214	1.173	121.329
Isotype	2	Low	0.4375	1.338	1.297	134.155
Anti-C5 Ctrl	2	High	0.2	0.164	0.123	12.7225
Anti-C5 Ctrl	2	Low	0.00625	1.251	1.21	125.157
Disabled Anti-C5 Ctrl	2	High	0.2	0.941	0.9	93.0916
Disabled Anti-C5 Ctrl	2	Low	0.00625	1.073	1.032	106.745
Isotype	2	High	14	1.014	0.973	100.642
Isotype	2	Low	0.4375	1.486	1.445	149.464
Anti-C5 Ctrl	2	High	0.2	0.288	0.247	25.5485
Anti-C5 Ctrl	2	Low	0.00625	1.591	1.55	160.324
Disabled Anti-C5 Ctrl	2	High	0.2	1.108	1.067	110.365
Disabled Anti-C5 Ctrl	2	Low	0.00625	1.135	1.094	113.158
Isotype	2	High	14	1.35	1.309	135.397
Isotype	2	Low	0.4375	1.716	1.675	173.254
Anti-C5 Ctrl	2	High	0.2	0.149	0.108	11.171
Anti-C5 Ctrl	2	Low	0.00625	1.309	1.268	131.156
Disabled Anti-C5 Ctrl	2	High	0.2	1.014	0.973	100.642
Disabled Anti-C5 Ctrl	2	Low	0.00625	1.534	1.493	154.429
Isotype	2	High	14	0.949	0.908	93.9191
Isotype	2	Low	0.4375	1.36	1.319	136.431
